# Supplementary material for: Prognostic and clinicopathological value of p53 expression in renal cell carcinoma: a meta-analysis
Source: PubMed Central journal article supplement (PMC5731961; doi:10.18632/oncotarget.21971), 2017-10-19
Supplement: oncotarget-08-102361-s001.pdf [file oncotarget-08-102361-s001.pdf]

## **Prognostic and clinicopathological value of p53 expression in renal cell carcinoma: a meta-analysis**

### **SUPPLEMENTARY MATERIALS**

**Supplementary Table 1: Main characteristics of included studies.** See [Supplementary Table 1](#)
